# Supplementary material for: Fe/Fe 3 C nanoparticles encapsulated in ZIF-8-derived carbon nanotubes as a cathode oxygen reduction catalyst for microbial fuel cells
Source: Royal Society of Chemistry journal article supplement (doi:10.1039/d5nr03967c), 2025-01-01
Supplement: d5nr03967c1.pdf [file d5nr03967c1.pdf]

## Supporting information

### Fe/Fe<sub>3</sub>C nanoparticles encapsulated in ZIF-8 derived carbon nanotubes as a cathode oxygen reduction catalyst for microbial fuel cells

Xinyi Wang<sup>a</sup>, Xinlu Lin<sup>b</sup>, Jie Zhou<sup>b</sup>, Yinhua Jiang<sup>c</sup>, Yuqiao Wang<sup>\*a</sup>

<sup>a</sup>Research Center for Nano Photoelectrochemistry and Devices, School of Chemistry and Chemical Engineering, Southeast University, Nanjing, Jiangsu 211189, China

<sup>b</sup>Advanced Solar Power (Hangzhou) Inc., 801 Lingyun Street, Hangzhou 310018, China

<sup>c</sup>School of Chemistry and Chemical Engineering, Jiangsu University, Zhenjiang 212013, China

\*Corresponding authors: Yuqiao Wang (Email: yqwang@seu.edu.cn).

#These authors contributed equally to this work.

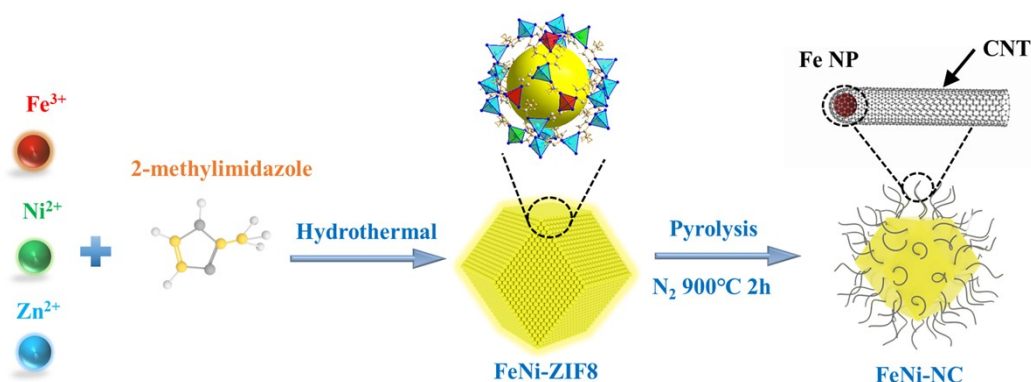

**Figure. S1.** Schematic illustration for synthesis of Fe/Fe<sub>3</sub>C@NiNC.

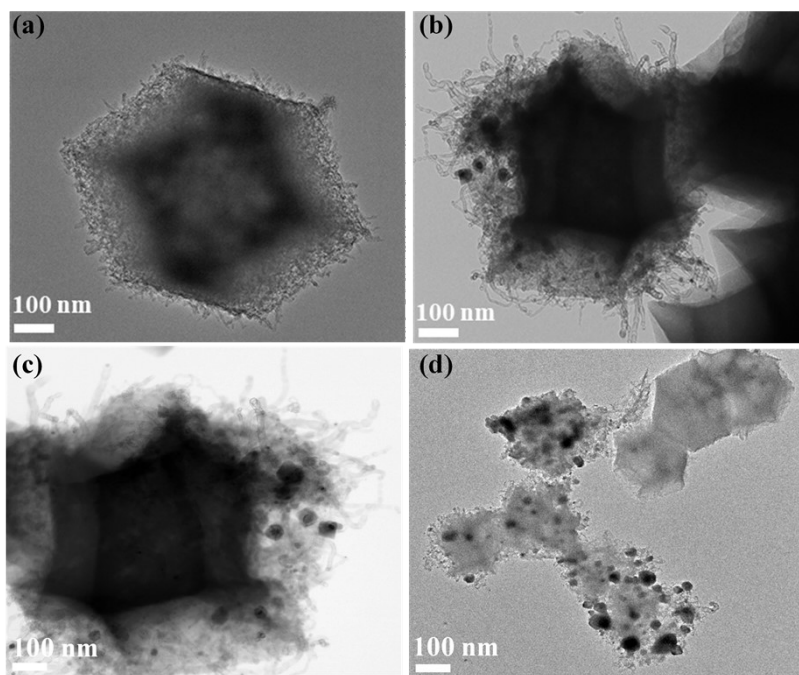

**Figure. S2.** TEM images of Fe/Fe<sub>3</sub>C@NiNC.

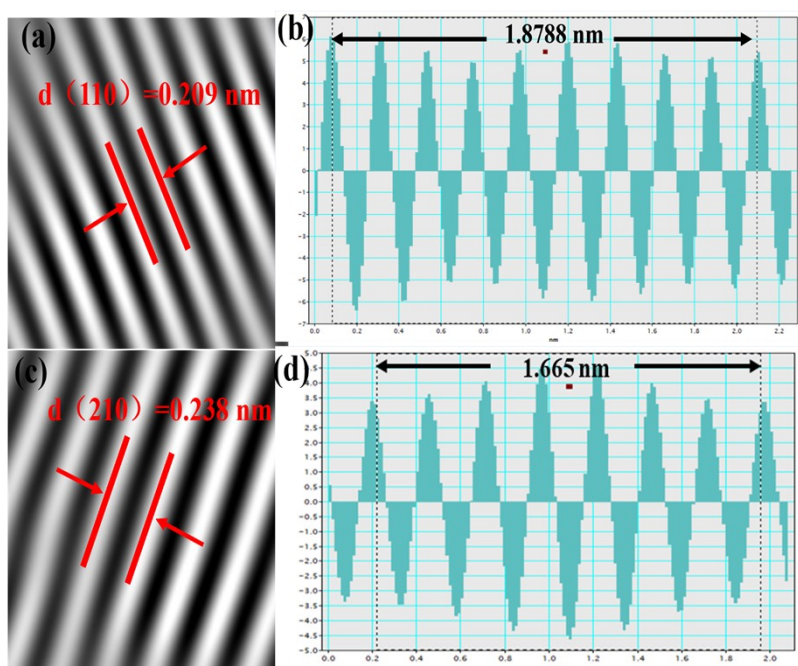

**Figure S3.** Enlarged HRTEM lattice fringe images of Fe/Fe<sub>3</sub>C@NiNC. (a–b) Fe phase; (c–d) Fe<sub>3</sub>C phase.

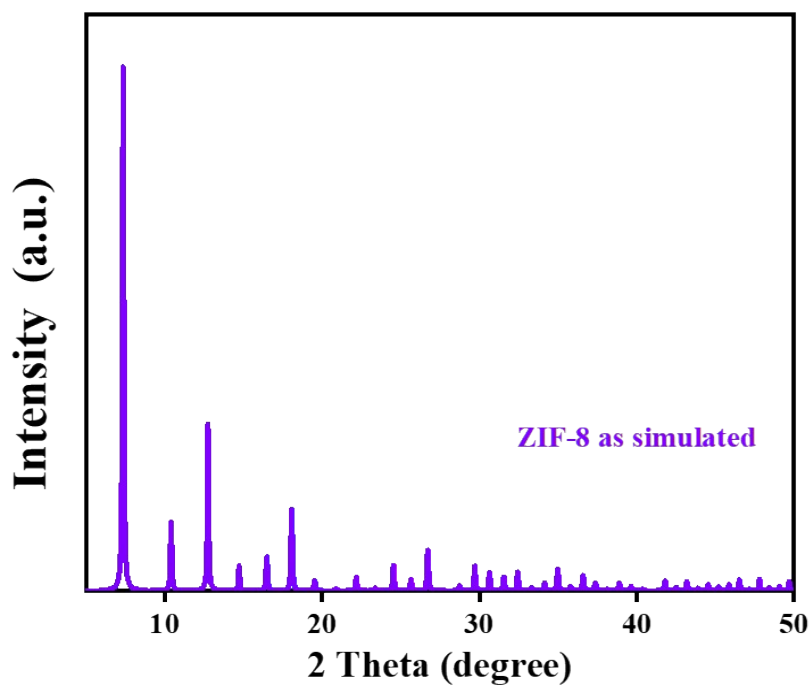

**Figure. S4.** XRD patterns of simulated ZIF-8 precursor.

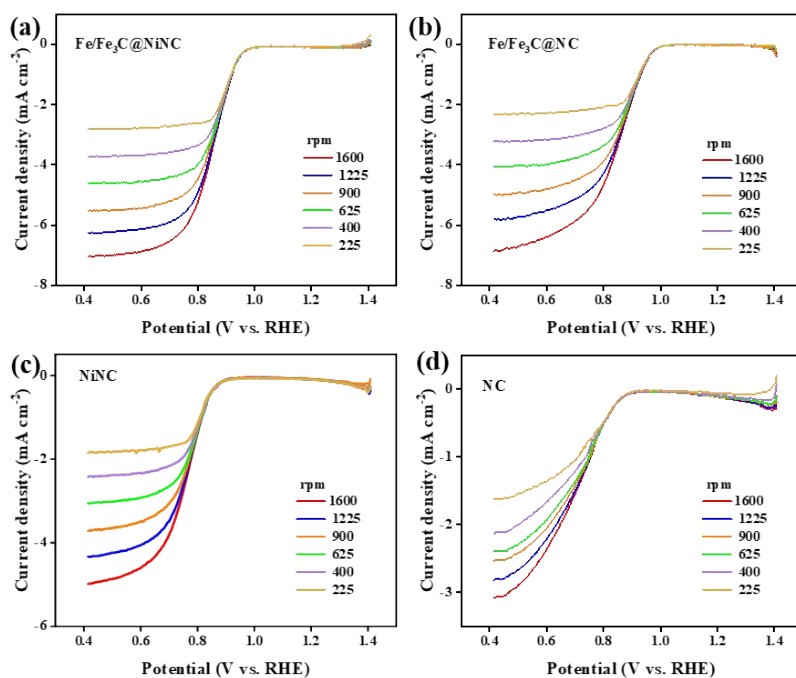

**Figure. S5.** LSV with different electrode rotation speeds of (a)  $\text{Fe/Fe}_3\text{C@NiNC}$ , (b)  $\text{Fe/Fe}_3\text{C@NC}$ , (c) NiNC, (d) NC.

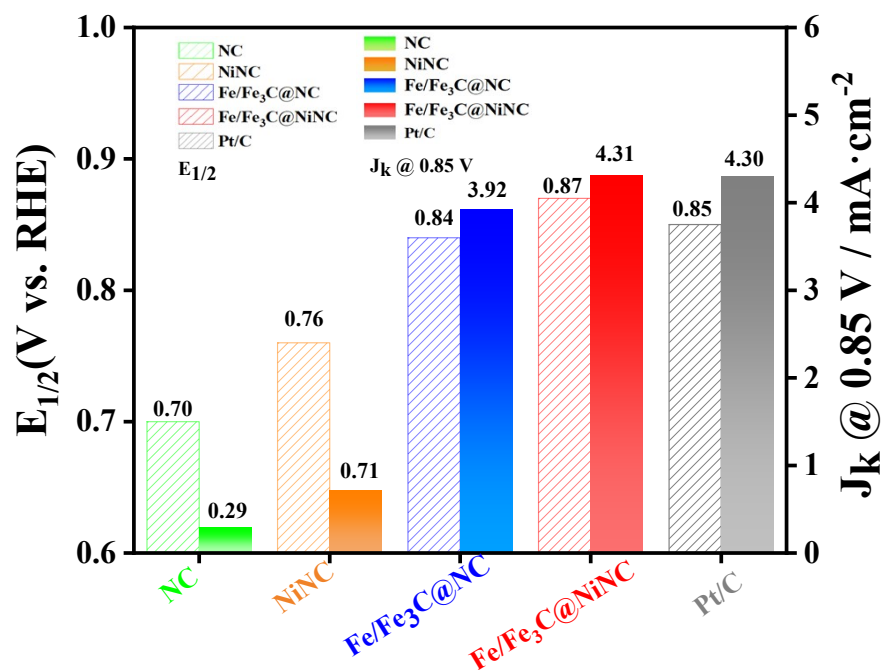

**Figure. S6.** Half-wave potential of  $E_{1/2}$  and kinetic current density  $J_k$ .

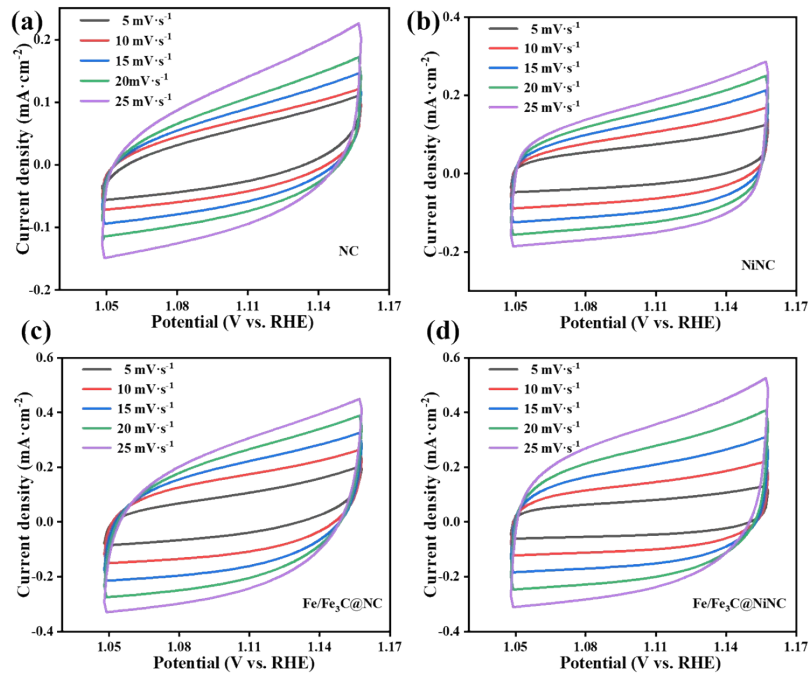

**Figure. S7.** CV curves of (a) NC, (b) NiNC, (c) Fe/Fe<sub>3</sub>C@NC, (d) Fe/Fe<sub>3</sub>C@NiNC at different scan rates (5, 10, 15, 20 and 25  $\text{mV s}^{-1}$ ).

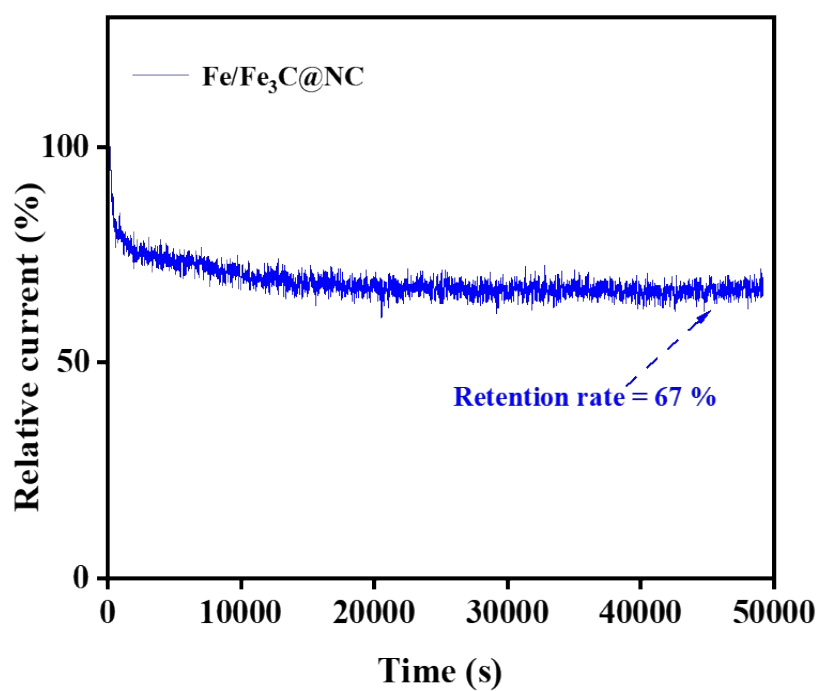

**Figure. S8.** Chronoamperometric response of Fe/Fe<sub>3</sub>C@NC.

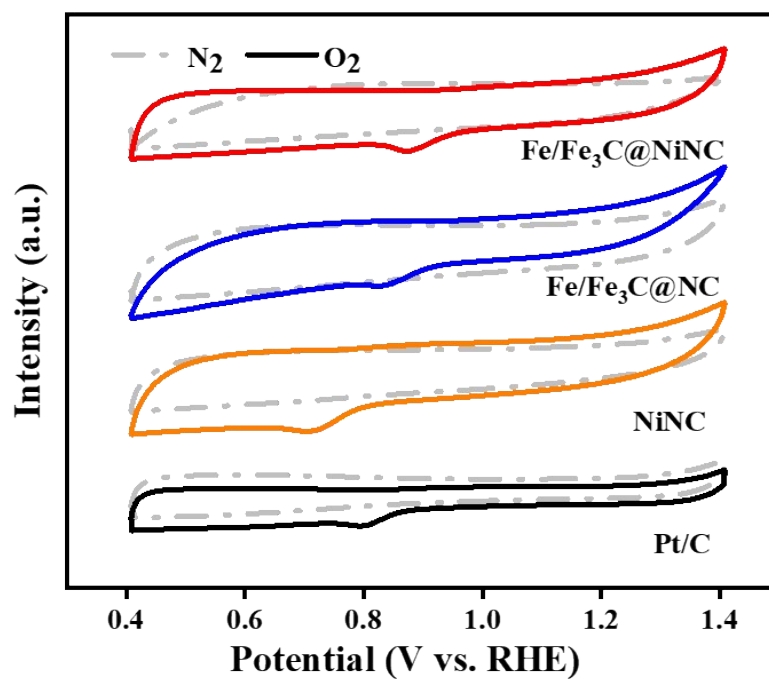

**Figure. S9.** CV curves in N<sub>2</sub>-saturated 0.1 MKOH and O<sub>2</sub>-saturated 0.1 MKOH of all catalysts.

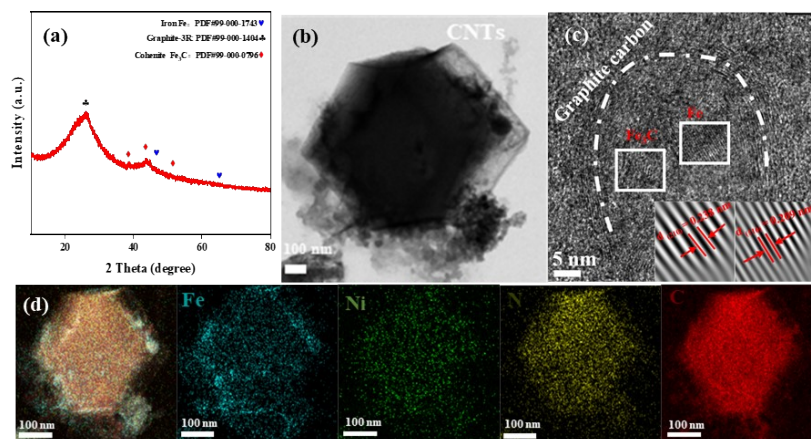

**Figure. S10.** (a) XRD image of Fe/Fe<sub>3</sub>C@NiNC after ORR. (b and c) TEM images of Fe/Fe<sub>3</sub>C@NiNC after ORR. (d) Elemental mapping images of Fe/Fe<sub>3</sub>C@NiNC after ORR.

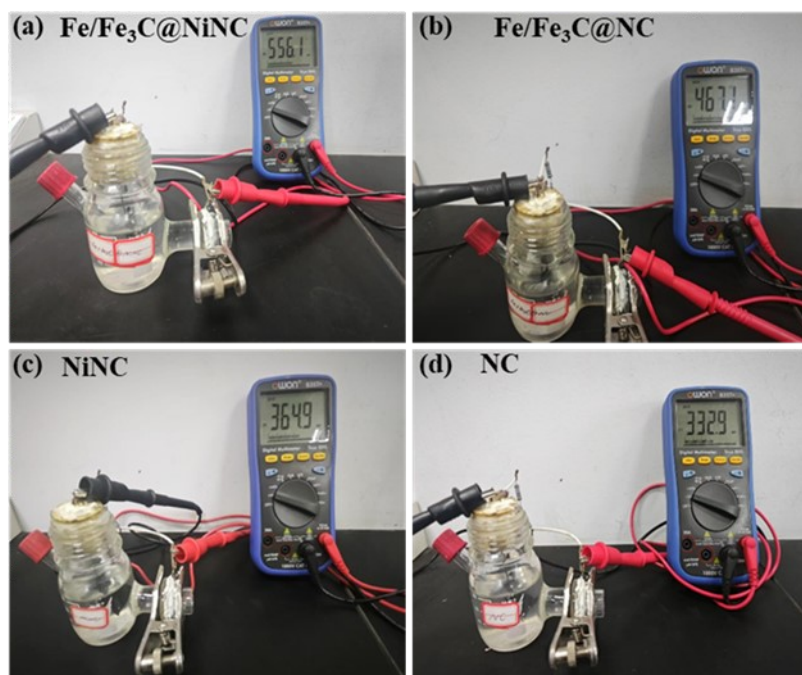

**Figure. S11.** The schematic diagrams of MFCs measurement.

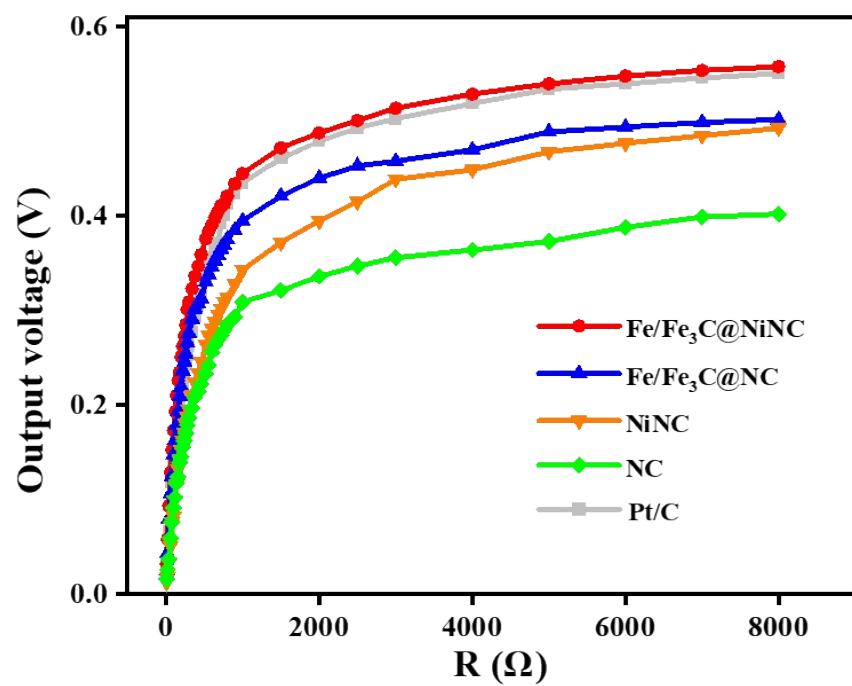

**Figure. S12.** The battery voltage under different external resistors.

**Table S1.** Actual mass ratio and atomic ratio of Fe/Fe<sub>3</sub>C@NiNC obtained from XPS.

| Elements | At%   |
|----------|-------|
| C 1s     | 87.84 |
| N 1s     | 10.51 |
| Fe 2p    | 1.32  |
| Ni 2p    | 0.33  |



**Table S2.** The content and distribution of different nitrogen species from N 1s XPS.

| Catalysts                 | Pyri-N (%) | Pyrr-N (%) | Graph-N (%) | M-N (%) | Ox-N (%) |
|---------------------------|------------|------------|-------------|---------|----------|
| Fe/Fe <sub>3</sub> C@NiNC | 54.5       | 17.2       | 6.9         | 17.8    | 4.4      |
| Fe/Fe <sub>3</sub> C@NC   | 51.8       | 18.6       | 6.7         | 18.1    | 4.6      |
| NiNC                      | 50.8       | 20.8       | 7.1         | 17.2    | 3.5      |
| NC                        | 49.2       | 23.2       | 20.2        | 0       | 7.3      |

**Table S3.** The simulated data from EIS.

| Catalysts                 | $R_s$ (ohm $\text{cm}^{-2}$ ) | $R_{ct}$ (ohm $\text{cm}^{-2}$ ) | $R_w$ (ohm $\text{cm}^{-2}$ ) |
|---------------------------|-------------------------------|----------------------------------|-------------------------------|
| Fe/Fe <sub>3</sub> C@NiNC | 0.71                          | 3.29                             | 0.75                          |
| Fe/Fe <sub>3</sub> C@NC   | 0.74                          | 3.46                             | 0.88                          |
| NiNC                      | 0.77                          | 4.28                             | 1.87                          |
| NC                        | 0.81                          | 4.52                             | 1.9                           |

**Table S4.** Summary of ORR actives of various catalysts in 0.1 M KOH.

| Catalysts                            | Half-wave Potential (V) | Onset Potential (V) | Limiting current density (mA cm <sup>-2</sup> ) | Ref.      |
|--------------------------------------|-------------------------|---------------------|-------------------------------------------------|-----------|
| Fe/Fe <sub>3</sub> C@NiNC            | 0.87                    | 0.95                | 7.0                                             | this work |
| Fe/S-N/C                             | 0.84                    | 0.95                | 5.9                                             | [1]       |
| FeMo-N-C                             | 0.84                    | 0.98                | 23.5                                            | [2]       |
| CoSn-NC                              | 0.84                    | 0.9                 | 7.13                                            | [3]       |
| CoCu-LDH@NC                          | 0.84                    | 0.89                | /                                               | [4]       |
| Co <sub>4</sub> @Fe <sub>1</sub> @NC | 0.835                   | 0.98                | /                                               | [5]       |
| Fe <sub>3</sub> C@NC                 | 0.81                    | 0.94                | 6.0                                             | [6]       |
| Cu <sub>2</sub> O@Co/NC              | 0.8                     | 0.89                | 3.8                                             | [7]       |
| CuCo@N/C                             | 0.78                    | 0.88                | 4.42                                            | [8]       |

**Table S5.** The performance of air-cathode double-chamber MFCs equipped with the various ORR catalysts.

| Anode                 | Cathode                                                               | External<br>Resistance ( $\Omega$ ) | Output<br>Voltage (mV) | Power<br>Density ( $\text{mW}\cdot\text{m}^{-2}$ ) | Ref.      |
|-----------------------|-----------------------------------------------------------------------|-------------------------------------|------------------------|----------------------------------------------------|-----------|
| Carbon<br>cloth       | Fe/Fe <sub>3</sub> C@NiNC                                             | 1000                                | 600                    | 1600                                               | this work |
| Carbon<br>cloth       | Ag@Co/Zn-NC                                                           | 1000                                | 470                    | 1586                                               | [9]       |
| Carbon fiber<br>brush | NPGC-1000                                                             | 1000                                | 650                    | 1390                                               | [10]      |
| Carbon<br>cloth       | Cu/Co/N-HS                                                            | 1000                                | 620                    | 1016                                               | [11]      |
| Carbon<br>cloth       | Cu/Co/N-C                                                             | 1000                                | 677                    | 1008                                               | [12]      |
| Carbon<br>felt        | Fe <sub>3</sub> C/Fe <sub>2</sub> P@NC-N <sub>4</sub> Fe <sub>2</sub> | 1000                                | 597                    | 949                                                | [13]      |
| Carbon<br>cloth       | Fe <sub>4</sub> -N-C@TABOH                                            | 1000                                | 670                    | 830                                                | [14]      |

## Reference

- [1]. Han W, Li C, Jiang Y, et al. Atomically-dispersed Fe-N<sub>x</sub> and C-S-C ordered mesoporous carbons as efficient catalysts for the oxygen reduction reaction in a microbial fuel cell[J]. *Journal of Alloys and Compounds*, 2021, 852: 156994.
- [2]. Zhu P, Xiong X, Wang X, et al. Regulating the FeN<sub>4</sub> moiety by constructing Fe-Mo dual-metal atom sites for efficient electrochemical oxygen reduction[J]. *Nano Letters*, 2022, 22(23): 9507-9515.
- [3]. Li L, Liu Z, Jiang D, et al. Bimetallic CoSn nanoparticles anchored on N-doped carbon as antibacterial oxygen reduction catalysts for microbial fuel cells[J]. *Nanoscale*, 2023, 15(38): 15739-15748.
- [4]. Li L, Jiang D, Cai S, et al. N-Doped Carbon-Supported CoCu-Layered Double Hydroxide Nanosheets as Antibacterial Oxygen Reduction Catalysts for Microbial Fuel Cells[J]. *ACS Applied Energy Materials*, 2024, 7(7): 2854-2861.
- [5]. Han A, Sun W, Wan X, et al. Construction of Co<sub>4</sub> atomic clusters to enable Fe-N<sub>4</sub> motifs with highly active and durable oxygen reduction performance[J]. *Angewandte Chemie International Edition*, 2023, 62(30): e202303185.
- [6]. Zhou Q, Yang Y, Ye Q, et al. Graphitic-nitrogen-enriched carbon skeleton with embedment of Fe<sub>3</sub>C for superior performance air cathode in zinc-air battery[J]. *Materials Today Energy*, 2023, 31: 101194.
- [7]. Chen H, Jiang D, Xie H, et al. Cu<sub>2</sub>O@Co/N-doped carbon as antibacterial catalysts for oxygen reduction in microbial fuel cells[J]. *Environmental Science: Nano*, 2023, 10(1): 158-165.
- [8]. Deng X, Imhanria S, Sun Y, et al. Mo, Fe bimetallic carbide composite as high stability electrocatalyst for oxygen reduction reaction[J]. *Journal of Environmental Chemical Engineering*, 2022, 10(3): 108052.
- [9]. Jiang D, Chen H, Zhu L, et al. Ag@Co/Zn N-Doped Carbon as Antibacterial Oxygen Reduction Catalysts for Microbial Fuel Cells[J]. *Energy Technology*, 2024: 2400062.
- [10]. Wang W, Tang L, Chen C, et al. Engineering Pt-S-Mo and Pd-S-Mo sites in hierarchical porous MoS<sub>2</sub> for boosted oxygen reduction activity in microbial fuel cell[J]. *Journal of Power Sources*, 2024, 598: 234143.
- [11]. Wang H, Wei L, Liu J, et al. Hollow N-doped bimetal carbon spheres with superior ORR catalytic performance for microbial fuel cells[J]. *Journal of colloid and interface science*, 2020, 575: 177-182
- [12]. Wang H, Wei L, Liu J, et al. Hollow bimetal ZIFs derived Cu/Co/N co-coordinated ORR electrocatalyst for microbial fuel cells[J]. *International Journal of Hydrogen Energy*, 2020, 45(7): 4481-4489.

- [13]. Chu C, Liu J, Wei L, et al. Iron carbide and iron phosphide embedded N-doped porous carbon derived from biomass as oxygen reduction reaction catalyst for microbial fuel cell[J]. *International Journal of Hydrogen Energy*, 2023, 48(11): 4492-4502.
- [14]. Jiang B, Jiang N, Cui Y, et al. Rapid Synthesis and Microenvironment Optimization of Hierarchical Porous Fe-N-C Catalysts for Enhanced ORR in Microbial Fuel Cells[J]. *Advanced Science*, 2024: 2402610.
